# Supplementary material
Source: publisher figshare collection journal article supplement (https://frontiersin.figshare.com/ndownloader/files/24170879)
Supplement: Supplementary file [file 24170879]

# Supplement 6

## Figure

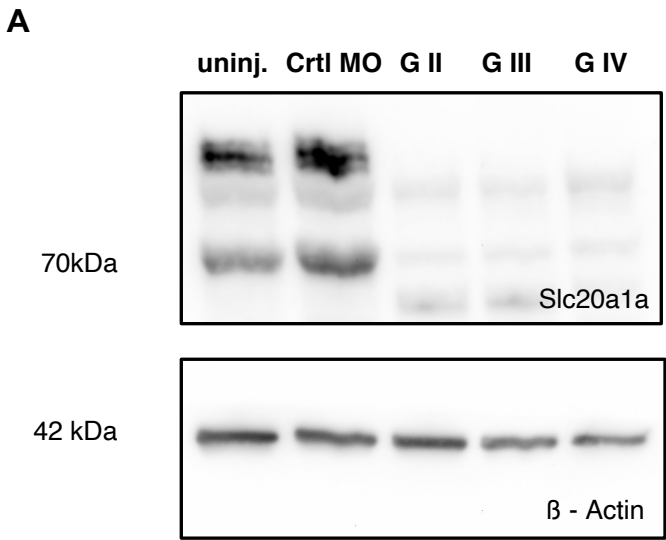

**S6 Fig. Western Blot\_Raw data**

Raw data of Western Blot confirming Slc20a1a knockdown in *slc20a1a* MO zfl. Protein was obtained at 2 dpf. Upper panel shows WB against Slc20a1a. While there is a strong signal at 70 kDa for Slc20a1a in uninjected (uninj.) and Control MO (Ctrl MO) group there is only a very weak detection of Slc20a1a at 70 kDa in *slc20a1a* MO KD groups (G II = mild phenotype, G III = moderate phenotype, G IV = severe phenotype; For detailed information on grading criteria see manuscript main text in the results section). Lower panel shows loading control β – Actin and therefore confirms equal protein loading.
